# Supplementary material
Source: Springer Nature journal article supplement (https://www.springermedizin.de/resource/supplementary/12913_2011_1981_MOESM1_ESM.pdf/9530688)

## 1. EXTERNAL STRUCTURES

Wider context in which action is contemplated and takes place  
e.g. the social, economic and material environment

## 2. INTERNAL STRUCTURES (what individuals 'know')

2a. General: e.g. a person's past experiences, educational and cultural background, ways of viewing the world, morals

2b. Specific: e.g. a person's understandings, assumptions and skills relevant to a particular here-and-now choice or action

## 3. ACTION

What the person does in a particular local situation

## 4. OUTCOMES

Intended and unintended impact on external and internal structures, which may be reproduced or changed

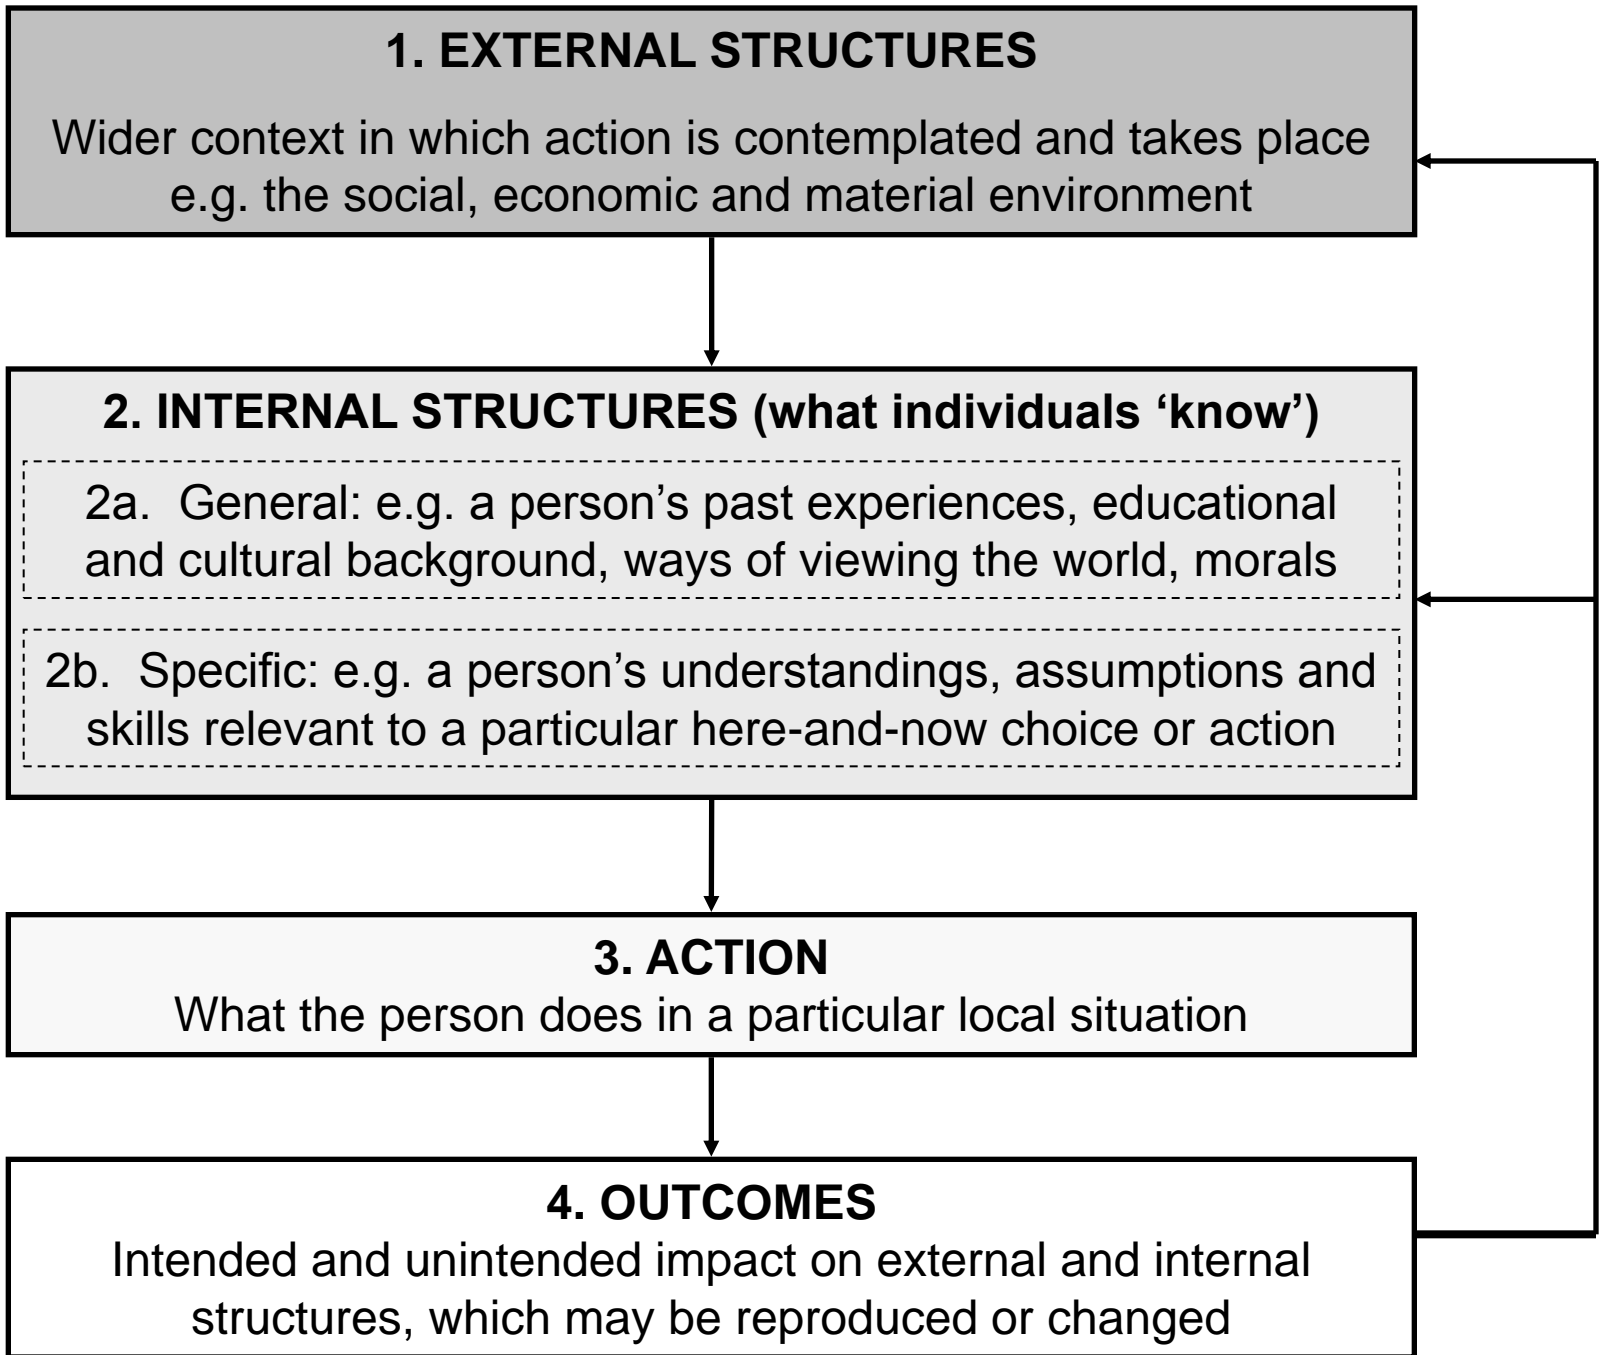

Supplement: MOESM1 [file 9530688]
